# Supplementary material for: Theoretical prediction of silicether: a two-dimensional hyperconjugated disilicon monoxide nanosheet
Source: Royal Society of Chemistry journal article supplement (doi:10.1039/d0na00110d), 2020-01-01
Supplement: d0na00110d1.pdf [file d0na00110d1.pdf]

## Supporting Information

### Theoretical Prediction of Silicether: A Two-Dimensional Hyperconjugated Disilicon Monoxide Nanosheet

Gui-Lin Zhu<sup>||</sup>, Xiao-Juan Ye<sup>||</sup>, Chun-Sheng Liu<sup>\*</sup>, and Xiao-Hong Yan

College of Electronic and Optical Engineering, Nanjing University of Posts and Telecommunications, Nanjing 210023, China

<sup>||</sup>The first two authors contributed equally to this work.

<sup>\*</sup>E-mail: cslu@njupt.edu.cn

| <b>Index</b>                                    | <b>page</b> |
|-------------------------------------------------|-------------|
| Fig.S1 .....                                    | S2          |
| Fig.S2 .....                                    | S2          |
| Fig.S3 .....                                    | S3          |
| Fig.S4 .....                                    | S3          |
| Fig.S5 .....                                    | S4          |
| Fig.S6 .....                                    | S4          |
| Fig.S7 .....                                    | S5          |
| Fig.S8 .....                                    | S5          |
| Fig.S9 .....                                    | S6          |
| Structural information of silicether.....       | S7          |
| Computational methods of carrier mobility ..... | S8          |
| Fig.S10 .....                                   | S8          |

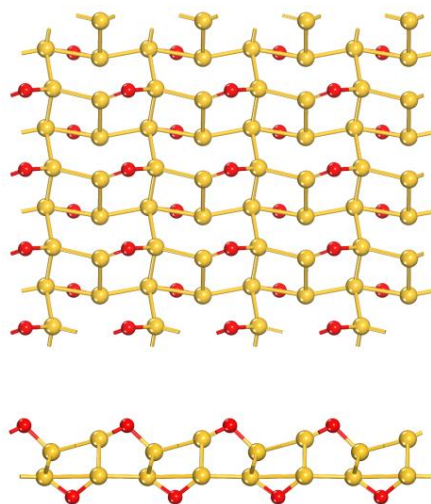

**Figure S1.** Snapshots for the final configurations of silicether after  $\sim 0.3$  ps AIMD simulations with temperature at 1000 K.

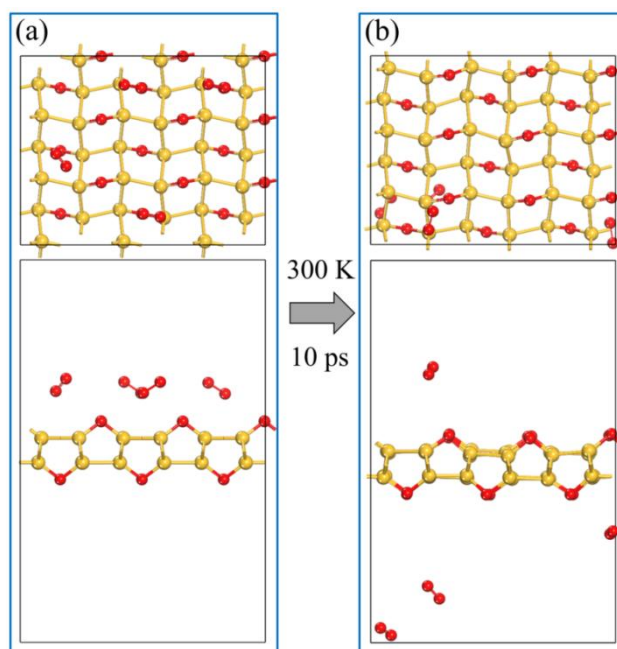

**Figure S2.** Top and side view of snapshots for the (a) initial and (b) final configurations of silicether exposed in  $O_2$  molecules after 10 ps AIMD simulations with temperature at 300 K. The simulated cell contains a  $3 \times 3$  silicether supercell and 4  $O_2$  molecules. The  $O_2$  molecules under the lower surface arise from the  $O_2$  molecules moving from one cell to another. It reveals a process that  $O_2$  molecules move away from the silicether surface rather than through it.

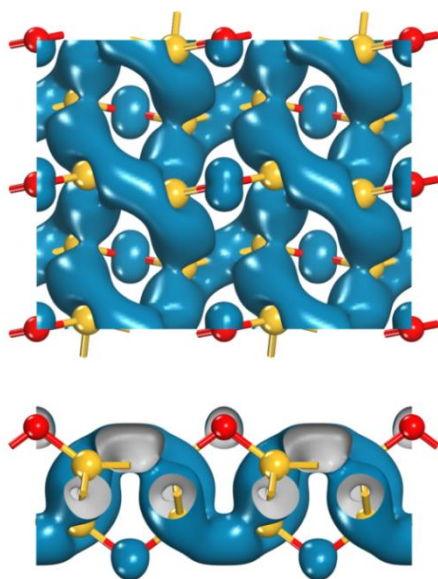

**Figure S3.** Top and side views of the band decomposed charge densities for VBM.

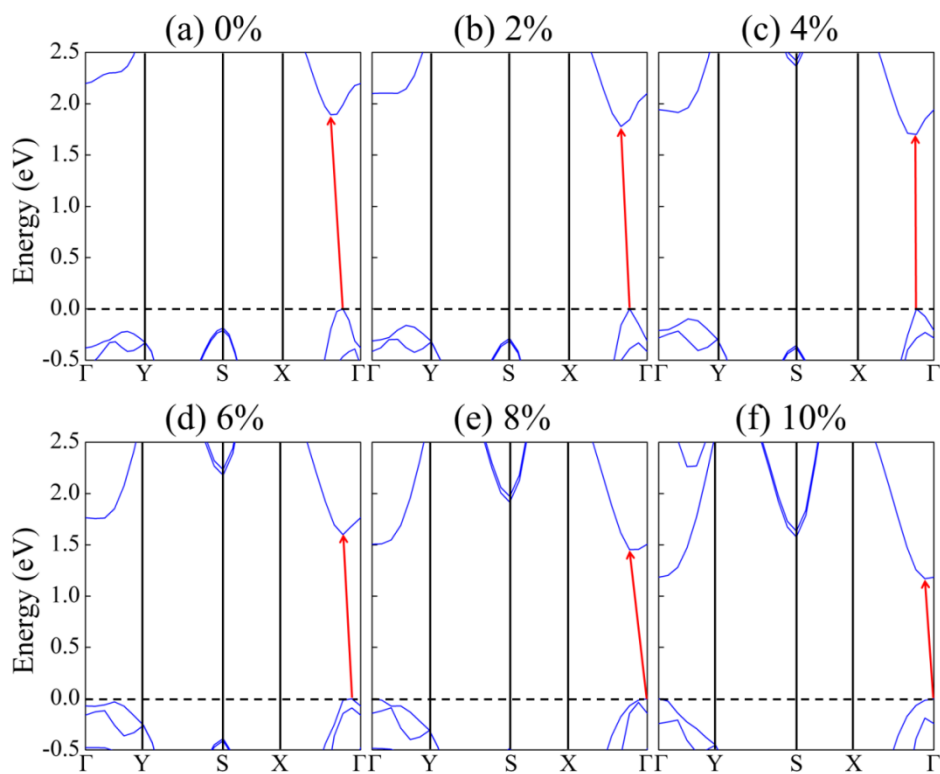

**Figure S4.** Band structures (HSE06) of silicether with respect to tensile strain along the armchair direction.

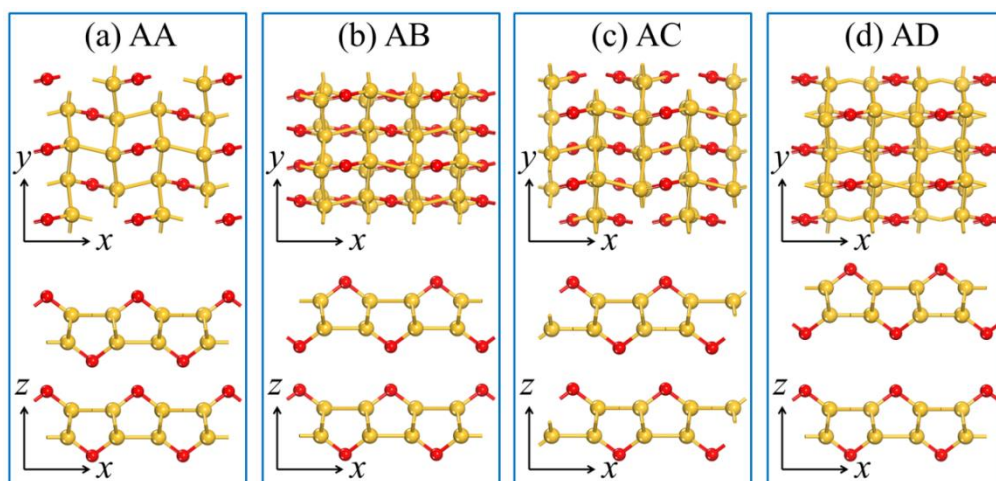

**Figure S5.** Top and side views of bilayer silicether for (a) AA, (b) AB, (c) AC, and (d) AD stacking patterns. AA: the top layer is directly stacked on the bottom layer; AB (AC): the upper layer of AA-stacking is shifted by half of a primitive cell along the  $x$  ( $y$ ) direction; AD: the upper layer of AA-stacking is shifted by half of a primitive cell both along the  $x$  and along the  $y$  direction.

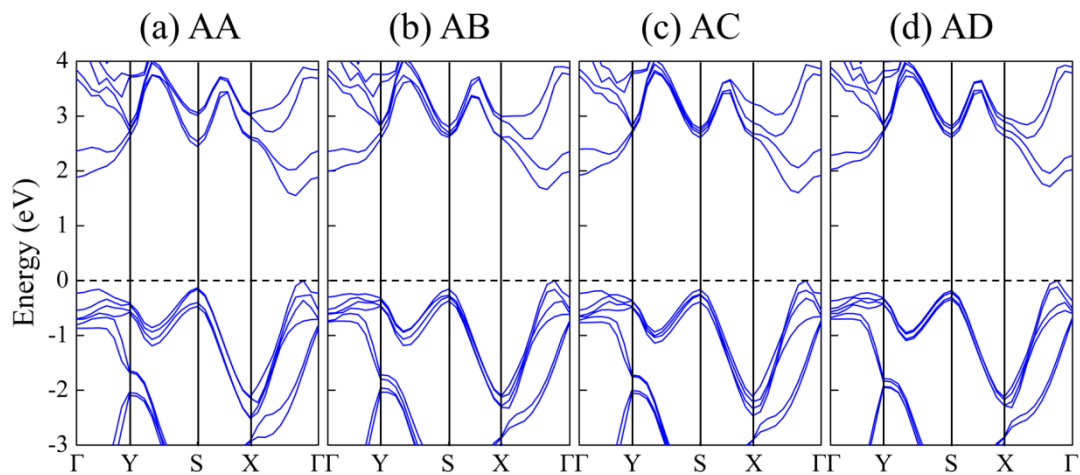

**Figure S6.** Band structures (HSE06) of bilayer silicether for (a) AA, (b) AB, (c) AC, and (d) AD stacking patterns.

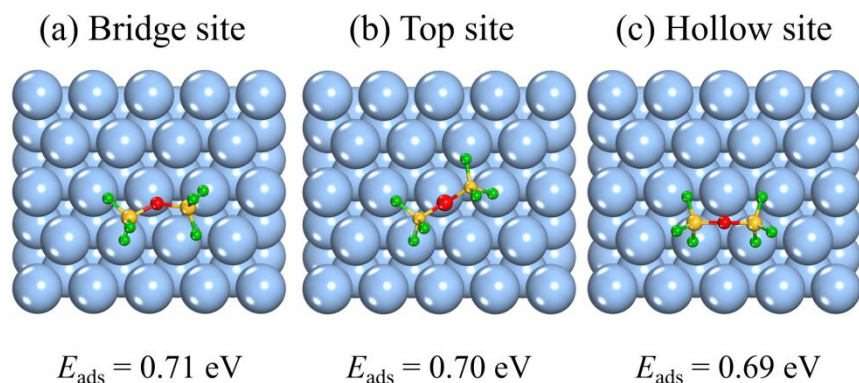

**Figure S7.** Three possible adsorption sites (bridge, top, and hollow) for disilyl ether adsorbed on Ag (100). The Ag(100) surface is modelled by a four-layered  $4 \times 4$  orthogonal supercell, with the bottom two Ag layers fixed in their bulk positions during the geometry relaxation. The adsorption energy ( $E_{\text{ads}}$ ) is given for each structure, defined as  $E_{\text{ads}} = E_{\text{sub}} + E_{\text{dis}} - E_{\text{total}}$ , where  $E_{\text{sub}}$ ,  $E_{\text{dis}}$ , and  $E_{\text{total}}$  are the total energies of the pristine substrate, the disilyl ether molecule in gas phase, and the disilyl ether adsorbed substrate, respectively.

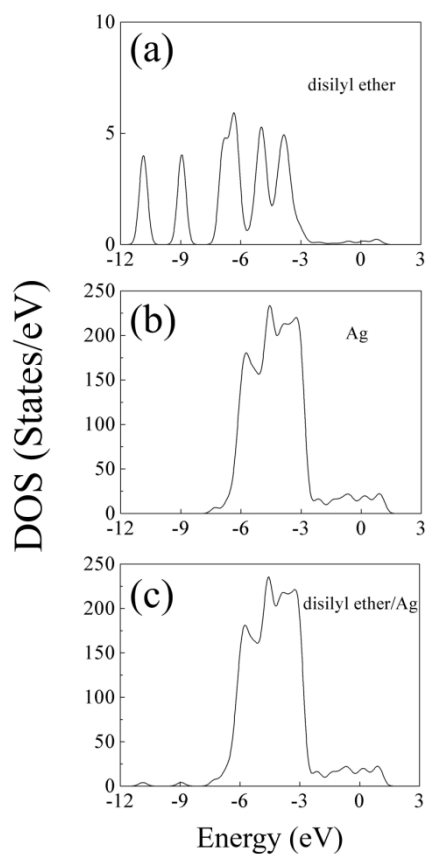

**Figure S8.** DOS of (a) disilyl ether, (b) Ag(100) substrate and (c) disilyl ether/Ag system.



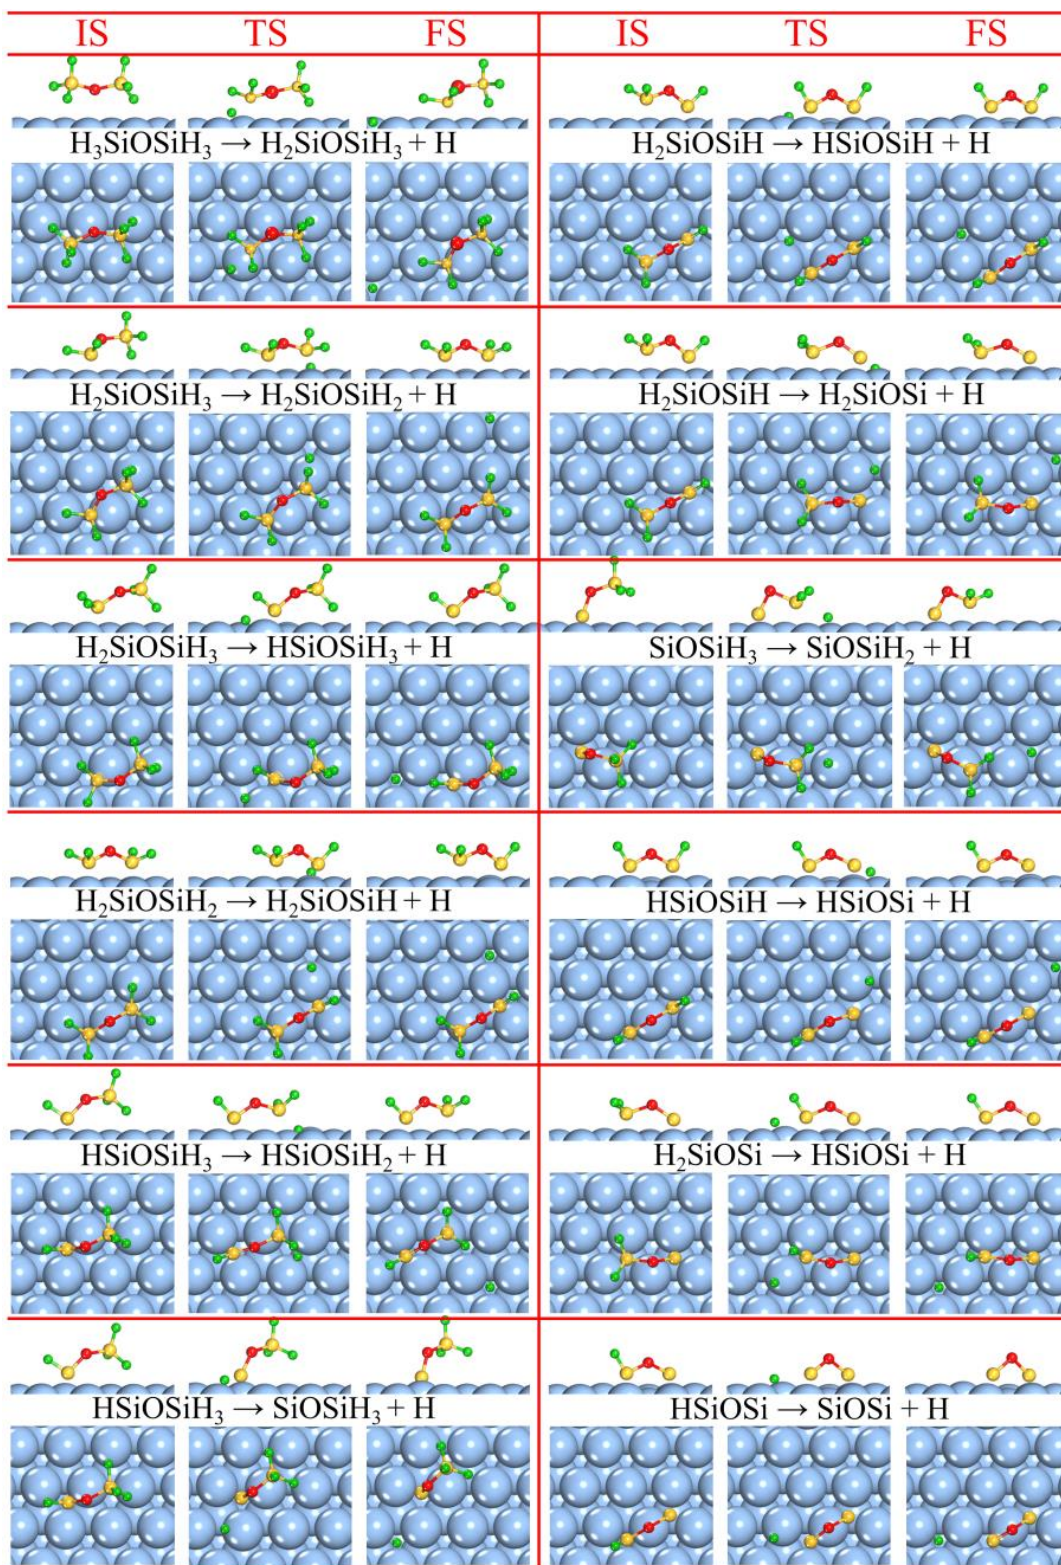

**Figure S9.** Geometric structures of the initial state (IS), transition state (TS), and final state (FS) of the every dehydrogenation step for disilyl ether on Ag (100).

**Table S1.** Structural informations of the silicether monolayer.

| Structure  | Space Group                         | Lattice                        | Wyckoff Positions (fractional) |          |          |          |
|------------|-------------------------------------|--------------------------------|--------------------------------|----------|----------|----------|
|            |                                     | Parameters                     | atoms                          | <i>x</i> | <i>y</i> | <i>z</i> |
| Silicether | <i>P2<sub>1</sub>2<sub>1</sub>2</i> | <i>a</i> =4.9400 Å             | Si(4c)                         | 0.7707   | 0.4317   | 0.4680   |
|            |                                     | <i>b</i> =3.8103 Å             | O(2a)                          | 0        | 0        | 0.5755   |
|            |                                     | <i>c</i> =23.1233 Å            |                                |          |          |          |
|            |                                     | $\alpha=\beta=\gamma=90^\circ$ |                                |          |          |          |

## Computational Methods of Carrier Mobility

We estimate the carrier mobility for silicether at room temperature (300 K) by using

$$\mu_x \approx \frac{eh^3 \left( \frac{5C_x + 3C_y}{8} \right)}{k_B T m_x^{\frac{3}{2}} m_y^{\frac{1}{2}} \left( \frac{9E_{1x}^2 + 7E_{1x}E_{1y} + 4E_{1y}^2}{20} \right)},$$

where  $m_x$  is the effective mass

in the transport direction and  $m_y$  is the effective mass in another direction. The term  $E_1$

defined by  $E_1 = \frac{\Delta V}{(\Delta l/l_0)}$  represents the DP constant of the valence-band minimum

(VBM) for hole or the conduction-band maximum (CBM) for electron along the transport direction. Here,  $\Delta V$  denotes the energy change of VBM or CBM when silicether

is compressed or dilated from the equilibrium  $l_0$  by a distance of  $\Delta l$ . The term  $C_x$  ( $C_y$ ) is the in-plane stiffness of the longitudinal strain in the  $x$ ( $y$ ) direction, which can be derived

from  $\frac{\Delta E}{S_0} = C_x \frac{(\Delta l/l_0)^2}{2}$ .  $\Delta E$  denotes the total energy difference under each strain, and  $S_0$

is the lattice area of pristine silicether. We use  $\Delta l/l_0$  ranging from -0.5% to 0.5% to fit the values of  $E_1$  and  $C_{2D}$  (Fig. S10).

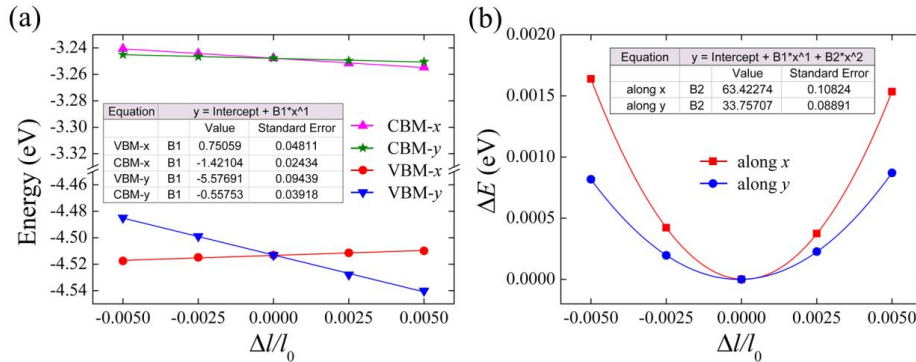

**Figure S10.** (a) DP constants and (b) in-plane stiffness of silicether along  $x$  and  $y$  directions at the PBE level of theory.
